# Supplementary material
Source: PubMed Central journal article supplement (PMC3800283)
Supplement: NIHMS515910-supplement-Supplement.pdf [file NIHMS515910-supplement-Supplement.pdf]

## SOM Discussion

### Signal for Site-Conservation Analyses

When examining conserved miRNA sites for favorable UTR contexts, we used the signal above background (sites selectively maintained) instead of the signal:background ratio. Signal above background indicates the selection of miRNA sites per UTR or segment of UTR, and thus it is the relevant measure of whether sites in a given context are more frequently subject to selection than sites in other contexts. In contrast, signal:background ratio (frequently also called the signal:noise ratio) is a measure of how well sites under selection can be distinguished from those conserved by chance. In UTR contexts that are enriched for conserved miRNA sites, there is also typically an increase in the conservation of other sequences that do not correspond to miRNA sites. In these circumstances, the signal above background improves because the increase in conserved miRNA sites outpaces the increase in conserved sequences that do not correspond to miRNA sites, but the signal:background ratio can remain constant or drop, despite the higher density of evolutionary selection for miRNA targeting. As a consequence, miRNA sites under selection can be paradoxically more difficult to predict with confidence when in favorable contexts because they tend to be associated with more background conservation than miRNA sites in poor contexts. For instance, Lewis et al. (2005) showed that within more highly conserved UTRs, the number of conserved miRNA sites above background increases, but the signal:background ratio drops because of the increase in background conservation.

Two phenomena can explain the association of greater background conservation with favorable context determinants. First, the selection acting on a miRNA site also acts to preserve the favorable context of the site, causing greater conservation in the vicinity of the site, although more limited than that for the site itself. This effect is compounded when a UTR has multiple conserved miRNA sites, and most UTRs with a conserved site to one miRNA family do have conserved sites to one or more additional miRNA families. Second, some UTR context determinants that encourage miRNA effectiveness likely generalize to RNA-protein interactions (e.g., to improve site accessibility), and a UTR regulated by miRNAs might also preferentially be regulated by proteins. As a result, these context determinants are associated with the conserved sequences that do not match miRNAs but can match the control sequences used to estimate the background conservation.

### Potential Correlations with Microarray Signal

We addressed the question of whether the level of mRNA expression, as measured by the intensity of the microarray signal, might correlate with and thereby confound interpretation of the specificity determinants. We examined the Spearman correlations for intensity vs. fold-change, considering each of the different canonical sites. The results were as follows:

8mer:  $\rho = -0.093$ ,  $P = 0.0020$   
 7mer-m8:  $\rho = -0.060$ ,  $P = 0.00098$   
 7mer-A1:  $\rho = -0.037$ ,  $P = 0.042$   
 6mer:  $\rho = -0.049$ ,  $P = 0.00013$

Thus downregulation was weakly correlated with higher intensity on the chip, presumably because the higher the intensity of the gene on the chip, the more likely that the gene is actually expressed in the cell, a prerequisite for downregulation. We minimized this effect by selecting for analysis only those genes that were expressed above median on the array, because genes expressed at levels lower than that would have a much smaller likelihood of going down. As a result, context determinants of our analysis were not correlated in a manner that would be a concern. For example, intensity and conservation are not significantly correlated. The other determinant that could have potentially been a concern was the local AU-effect. However, intensity and overall AU-richness were correlated in the wrong direction to explain the AU-effects ( $\rho = -0.0454$ , indicating that AU-rich genes are expressed at slightly lower levels), and thus this was also not a concern.

**Table S1.** Vertebrate miRNA families. Listed are 73 human miRNAs, each representing a different family conserved in human, mouse, rat, dog and zebrafish.

| Family  | 7mer-m8 site | Representative sequence  | miRBase name   | Accession    |
|---------|--------------|--------------------------|----------------|--------------|
| let-7   | CUACCUC      | UGAGGUAGUAGGUUGUAUAGUU   | hsa-let-7a     | MIMAT0000062 |
| miR-1   | ACAUUCC      | UGGAAUGUAAAGAAGUAUGUA    | hsa-miR-1      | MIMAT0000416 |
| miR-7   | GUCUUC       | UGGAAGACUAGUGAUUUUGUUG   | hsa-miR-7      | MIMAT0000252 |
| miR-9   | ACCAAAG      | UCUUUGGUUAUCUAGCUGUAUGA  | hsa-miR-9      | MIMAT0000441 |
| miR-10  | ACAGGGU      | UACCCUGUAGAUCGAAUUUGUG   | hsa-miR-10a    | MIMAT0000253 |
| miR-15  | UGCUGCU      | UAGCAGCACAUAAUGGUUUGUG   | hsa-miR-15a    | MIMAT0000068 |
| miR-17  | GCACUUU      | CAAAGUGCUUACAGUGCAGGUAGU | hsa-miR-17-5p  | MIMAT0000070 |
| miR-18  | GCACCUU      | UAAGGUGCAUCUAGUGCAGUA    | hsa-miR-18a    | MIMAT0000072 |
| miR-19  | UUUGCAC      | UGUGCAAUUCUAUGCAAACUGA   | hsa-miR-19a    | MIMAT0000073 |
| miR-21  | AUAAGCU      | UAGCUUAUCAGACUGAUGUUGA   | hsa-miR-21     | MIMAT0000076 |
| miR-22  | GGCAGCU      | AAGCUGCCAGUUGAAGAACUGU   | hsa-miR-22     | MIMAT0000077 |
| miR-23  | AAUGUGA      | AUCACAUUGCCAGGGAUUUC     | hsa-miR-23a    | MIMAT0000078 |
| miR-24  | CUGAGCC      | UGGCUCAGUUCAGCAGGAACAG   | hsa-miR-24     | MIMAT0000080 |
| miR-26  | UACUUGA      | UUCAAGUAAUUCAGGAUAGGUU   | hsa-miR-26b    | MIMAT0000083 |
| miR-27  | ACUGUGA      | UUCACAGUGGCUAAGUUCUGC    | hsa-miR-27b    | MIMAT0000419 |
| miR-29  | UGGUGCU      | UAGCACAUCUGUAAAUCGGUU    | hsa-miR-29a    | MIMAT0000086 |
| miR-30  | UGUUUAC      | UGUAAACAUCUCCAGCUGGAAG   | hsa-miR-30a-5p | MIMAT0000087 |
| miR-31  | AUCUUGC      | GGCAAGAUGCUGGCAUAGCUG    | has-mir-31     | MIMAT0000089 |
| miR-33  | CAAUGCA      | GUGCAUUGUAGUUGCAUUG      | hsa-miR-33     | MIMAT0000091 |
| miR-34a | CACUGCC      | UGGCAGUGUCUAGCUGGUUGUU   | hsa-miR-34a    | MIMAT0000255 |
| miR-92  | GUGCAAU      | UAUUGCACUUGUCCCGCCUG     | hsa-miR-92     | MIMAT0000092 |
| miR-93  | AGCACUU      | AAAGUGCUGUUCGUGCAGGUAG   | hsa-miR-93     | MIMAT0000093 |
| miR-96  | GUGCCAA      | UUUGGCACUAGCACAUUUUUGC   | hsa-miR-96     | MIMAT0000095 |
| miR-99  | UACGGGU      | AACCCGUAGAUCGGAUCUUGUG   | hsa-miR-99a    | MIMAT0000097 |
| miR-101 | GUACUGU      | UACAGUACUGUGAUAAACUGAAG  | hsa-miR-101    | MIMAT0000099 |
| miR-103 | AUGCUGC      | AGCAGCAUUGUACAGGGCUAUGA  | hsa-miR-103    | MIMAT0000101 |
| miR-122 | ACACUCC      | UGGAGUGUGACAAUGGUGUUUGU  | hsa-miR-122a   | MIMAT0000421 |
| miR-124 | GUGCCUU      | UAAGGCACGCGUGAAUGCCA     | hsa-miR-124a   | MIMAT0000422 |
| miR-125 | CUCAGGG      | UCCUGAGACCCUUUAACCCUGG   | hsa-miR-125a   | MIMAT0000443 |
| miR-126 | CGGUACG      | UCGUACCGUGAGUAAUAAUGC    | hsa-miR-126    | MIMAT0000445 |
| miR-128 | CACUGUG      | UCACAGUGAACC GGUCUCUUUU  | hsa-miR-128a   | MIMAT0000424 |
| miR-129 | GCAAAAA      | CUUUUUGCGGUCUGGGCUUGC    | hsa-miR-129    | MIMAT0000242 |
| miR-130 | UUGCACU      | CAGUGCAAUGUUAAAAGGGCAU   | hsa-miR-130a   | MIMAT0000425 |
| miR-132 | GACUGUU      | UACAGUCUACAGCCAUGGUCG    | hsa-miR-132    | MIMAT0000426 |
| miR-133 | GGGACCA      | UUGGUCCCCUUAACCAGCUGU    | hsa-miR-133a   | MIMAT0000427 |
| miR-135 | AAGCCAU      | UAUGCUUUUUUAUCCUAUGUGA   | hsa-miR-135a   | MIMAT0000428 |
| miR-137 | AAGCAAU      | UAUUGC UUAAGAAUACGCGUAG  | hsa-miR-137    | MIMAT0000429 |
| miR-138 | CACCAGC      | AGCUGGUGUUGUGAAUC        | hsa-miR-138    | MIMAT0000430 |
| miR-139 | ACUGUAG      | UCUACAGUGCACGUGUCU       | hsa-miR-139    | MIMAT0000250 |
| miR-140 | AAACCAC      | AGUGGUUUUACCCUAUGGUAG    | hsa-miR-140    | MIMAT0000431 |
| miR-141 | CAGUGUU      | UAACACUGUCUGGUAAAAGAUGG  | hsa-miR-141    | MIMAT0000432 |
| miR-142 | ACACUAC      | UGUAGUGUUUCCUACUUUAUGGA  | hsa-miR-142-3p | MIMAT0000434 |
| miR-143 | UCAUCUC      | UGAGAUGAAGCACUGUAGCUCA   | hsa-miR-143    | MIMAT0000435 |
| miR-144 | AUACUGU      | UACAGUAUAGAUGAUGUACUAG   | hsa-miR-144    | MIMAT0000436 |
| miR-145 | AACUGGA      | GUCCAGUUUCCCAGGAAUCCCUU  | hsa-miR-145    | MIMAT0000437 |
| miR-146 | AGUUCUC      | UGAGAACUGAAUCCAUUGGUU    | hsa-miR-146a   | MIMAT0000449 |
| miR-148 | UGCACUG      | UCAGUGCACUACAGAACUUUGU   | hsa-miR-148a   | MIMAT0000243 |
| miR-150 | UUGGGAG      | UCUCCCAACCCUUGUACCAGUG   | hsa-miR-150    | MIMAT0000451 |
| miR-153 | CUAUGCA      | UUGCAUAGUCACAAAAGUGA     | hsa-miR-153    | MIMAT0000439 |
| miR-181 | UGAAUGU      | AACAUUAACGCGUCGUGGAGU    | hsa-miR-181a   | MIMAT0000256 |
| miR-182 | UUGCCAA      | UUUGGCAAUGGUAGAACUCACA   | hsa-miR-182    | MIMAT0000259 |
| miR-183 | GUGCCAU      | UAUGGCACUGGUAGAAUUCACUG  | hsa-miR-183    | MIMAT0000261 |
| miR-184 | UCCGUCC      | UGGACGGAGAACUGAUAGGGU    | hsa-miR-184    | MIMAT0000454 |
| miR-187 | AGACACG      | UCGUGUCUUGUGUUGCAGCCG    | hsa-miR-187    | MIMAT0000262 |

|          |         |                          |              |              |
|----------|---------|--------------------------|--------------|--------------|
| miR-192  | UAGGUCA | CUGACCUAUGAAUUGACAGCC    | hsa-miR-192  | MIMAT0000222 |
| miR-193  | GGCCAGU | AACUGGCCUACAAAGUCCCAG    | hsa-miR-193a | MIMAT0000459 |
| miR-194  | CUGUUAC | UGU AACAGCAACUCCAUGUGGA  | hsa-miR-194  | MIMAT0000460 |
| miR-196  | ACUACCU | UAGGUAGUUUCAUGUUGUUGG    | hsa-miR-196a | MIMAT0000226 |
| miR-199  | ACACUGG | CCCAGUGUUUCAGACUACCUGUUC | hsa-miR-199a | MIMAT0000231 |
| miR-200b | CAGUAUU | UAAUACUGCCUGGUAUGAUGAC   | hsa-miR-200b | MIMAT0000318 |
| miR-203  | CAUUUCA | GUGAAAUGUUUAGGACCACUAG   | hsa-miR-203  | MIMAT0000264 |
| miR-204  | AAAGGGA | UUCCCUUUGUCAUCCUAUGCCU   | hsa-miR-204  | MIMAT0000265 |
| miR-205  | AUGAAGG | UCCUUCAUUCACCGGAGUCUG    | hsa-miR-205  | MIMAT0000266 |
| miR-210  | ACGCACA | CUGUGCGUGUGACAGCGGCUGA   | hsa-miR-210  | MIMAT0000267 |
| miR-214  | CCUGCUG | ACAGCAGGCACAGACAGGCAG    | hsa-miR-214  | MIMAT0000271 |
| miR-216  | UGAGAUU | UAAUCUCAGCUGGCAACUGUG    | hsa-miR-216  | MIMAT0000273 |
| miR-217  | AUGCAGU | UACUGCAUCAGGAACUGAUUGGAU | hsa-miR-217  | MIMAT0000274 |
| miR-218  | AAGCACA | UUGUGCUUGAUCUAACCAUGU    | hsa-miR-218  | MIMAT0000275 |
| miR-219  | GACAAUC | UGAUUGUCCAAACGCAAUUCU    | hsa-miR-219  | MIMAT0000276 |
| miR-221  | AUGUAGC | AGCUACAUUGUCUGCGGGUUUC   | hsa-miR-221  | MIMAT0000278 |
| miR-223  | AACUGAC | UGUCAGUUUGUCAAAUACCCC    | hsa-miR-223  | MIMAT0000280 |
| miR-338  | AUGCUGG | UCCAGCAUCAGUGAUUUUGUUGA  | hsa-miR-338  | MIMAT0000763 |
| miR-375  | CGAACAA | UUUGUUCGUUCGGCUCGCGUGA   | hsa-miR-375  | MIMAT0000728 |

**Table S2.** Synthetic miRNA duplexes used in microarray transfection experiments.

---

|                                |                                |
|--------------------------------|--------------------------------|
| miR-1                          | miR-132                        |
| 5' -UGGAAUGUAAAAGAAGUAUGUA-3'  | 5' -UACAGUCUACAGCCAUGGUCG-3'   |
|                                |                                |
| 3' -AUAACUUAUUAUUUCUUAUAC-5'   | 3' -UAAUUGUCAGAUGUCGGUACCA-5'  |
| miR-7                          | miR-133                        |
| 5' -UGGAAGACUAGUGAUUUUGUU-3'   | 5' -UUGGUCCCCUUAACCAGCUGU-3'   |
| ••                             | ••                             |
| 3' -UAAUUUUCUGAUCACUAAAAC-5'   | 3' -UAAAUUAGGGGAAGUUGGUCGA-5'  |
| miR-9                          | miR-142                        |
| 5' -UCUUUGGUUAUCUAGCUGUAUGA-3' | 5' -UGUAGUGUUCCUACUUUAUGGA-3'  |
|                                | •                              |
| 3' -UAACAAACCAAUAGAUCGACAU-5'  | 3' -UAAUAUCACAAAGGAUGAAAUAC-5' |
| miR-122                        | miR-148                        |
| 5' -UGGAGUGUGACAAUGGUGUUUGU-3' | 5' -UCAGUGCAUCACAGAACUUUGU-3'  |
| ••                             |                                |
| 3' -UAAUUUCACACUGUUACCACAAA-5' | 3' -UAACUCACGUAGUGUCUUGAAA-5'  |
| miR-124                        | miR-181                        |
| 5' -UAAGGCACGCGGUGAAUGCCA-3'   | 5' -AACAUUCAACGCUGUCGGUGAGU-3' |
|                                |                                |
| 3' -UAAUUCGUGCGCCACUACG-5'     | 3' -UAUAGUAAGUUGCGACAGCCACU-5' |
| miR-128                        |                                |
| 5' -UCACAGUGAACCGGUCUCUUUU-3'  |                                |
|                                |                                |
| 3' -UAACUGUCACUUGGCCAGAGAA -5' |                                |

---

**Table S3.** Synthetic miRNA duplexes used in reporter experiments. miR-1, miR-124 and miR-133 duplexes are identical to those used in microarray transfection experiments (Table S2).

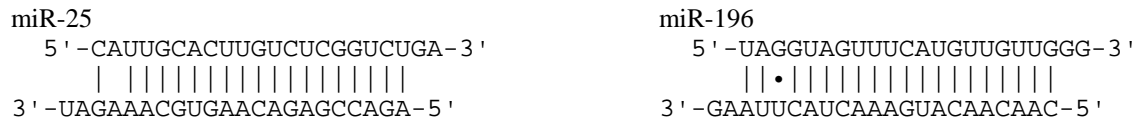

**Table S4.** Sequences of UTR fragments assayed in Figures 1G-I and 4C.

Reporter plasmids encoded Renilla luciferase and were constructed in pIS2. pIS2 was derived from pRL-SV40 (Promega) by insertion of a multiple cloning site (shown below) within the region corresponding to the 3' UTR of the luciferase mRNA. Listed are sequences of UTR fragments, annotating their GenBank accession number, the restriction sites used in cloning (5' site – 3' site), the reporter plasmid name (in brackets), and the miRNA target sites (underlined). To disrupt miR-124 sites, the seed match TGCCTT was changed to TcggTT, except for the sites disrupted in the rightmost set of Figure 1G, which were instead changed to TGCCaa. To disrupt miR-1 sites, the seed match CATTC was changed to CtgaCC. To disrupt miR-133 site, the seed match GGACCA was changed to GctgCA.

>Figure 4C; NM\_002508 AgeI-SpeI [pAG186]

```
accggctgcttgcctgacaacacacttgggagttgactgtatcgaacagaaatgaagacaagagtgccttat
ttcctttccaagtatttcacagcaacactctacttgaagcaacttggccagattgaaaagtgtcctctgg
ctgagtggccactaggcccagaccagcccagcctgagccccaacaacttttcctcactgttccccaaaa
catgcaccctggacttctctaataagaaaagtctccaccctacacaaggacagaaccctccaccctacc
ccaaccctcagacagacttatacaccctgagtgaggattacatgcccatcccagtgctcctaggaccttt
cccaatactagccccccagtggtgaacagaacctcccaaatttgagttgcacccttcctgtggccttatg
agctcagcctcgctttgaggtaccaccgctcctgtcagctccttgacctatgagccggggcctgactagga
aaagttgggagttaggaggaaattagcattccttaattgtttgtttgggtgctctgaatcttcttttat
tatagtcctatagttttactcctcagttcctcaccatcatcatcttgtctaagacccccattataatattc
atgcgctgctttttcatcaaacctaccctgtcctagagatctatgggcatttgggtggatgataatgagca
gccccctccagatagaatgtcaatatttgagcagtaggatattggcatttgttagttaaaggcttaaatca
aaagaatgtccaatggtaggaatttcaaggtgtaggtcagatatttgagaataggggatttttttgatgtg
ccttaaattataccaaagattactaattattcctctttgccccaaaataacttgcacccaaggttctagtctc
tgttgctgtgctgggtctttagccccactgctggcactgatgtcctcctttttcacgactagt
```

>Figure 1G, 1<sup>st</sup> set; NM\_014397 SacI-SpeI [pAG184]

```
gcgtggatgcaccgtgccttatcaaagccagcaccactttgccttacttgagtcgctcttctcttcgagtg
ccacctggtagcctagaacagctaagaccacaggggttcagcaggttccccaaaaggctgccagccttaca
gcagatgctgaaggcagagcagctgagggaggggctggccacatgtcactgatggtcagattccaaagt
cctttctttatactgttgtggacaatctcagctgggtcaataagggcaggtgggttcagcgagccacggcag
ccccctgtatctggattgtaattgtgaatctttagggttaattcctccagtgacctgtcaaggcttatgctaa
caggagacttgcaggag
```

>Inter-site sequence for Figure 1G, 2<sup>nd</sup> set [pAG400]; otherwise as for pAG184

```
gtgccttacgtatatctgaactctgtaagccagcaccactttgcctta
```

>Inter-site sequence for Figure 1G, 3<sup>rd</sup> set [pAG404]; otherwise as for pAG184

```
gtgccttacgctttatctgtatatctgaactcttgaacttatagcgttaagccagcaccactttgcctta
```

> Inter-site sequence for Figure 1G, 4<sup>th</sup> set [pAG420]; otherwise as for pAG184

```
gtgccttacagagttcagatatacgttaagccagcaccactttgcctta
```

> Inter-site sequence for Figure 1G, 5<sup>th</sup> set [pAG424]; otherwise as for pAG184

```
gtgccttacgctataagtttcaagagttcagatatacagataaagcgttaagccagcaccactttgcctta
```

>Figure 1I, 1<sup>st</sup> set; NM\_005433 SacI-SpeI [pAG428]

```
gagctcttatcagcgtatctcaggggtccaaacaaaatagagctaagatactgatgacagtggtgggtgacag
catggtaatgaaggacagtgaggctcctgcttatttataaatcatttcctttctttttttccccaaagtca
gaattgctcaaagaaaattatttattgttacagataaaaacttgagagataaaaagctataaccataataaaa
tctaaaattaaggaatatcatgggaccacaaataattccattccagtttttttaagtttcttgcatttattat
tctcaaaagttttttctaagttaaacagtcagtatgcaatcttaatatatgctttcttttgcattggacatg
ggccaggtttttcaaaaggaatataaacaggatctcaaaccttgattaaatgttagaccacagaagtggaaat
ttgaaagtataatgcagtagcatttaattcatgttcatggaactgaaagaataagaactttttcacttcag
tccttttctgaagagtttgacttagaataatgaaggtaactagaaagtgagttaatcttgtatgaggttgc
attgatTTTTTaaaggcaatatataattgaaactactgtccaatcaaaggggaaatgTTTTgatctttagat
agcatgcaaagtaagaccagcattttactagt
```

>Figure 1I, 2<sup>nd</sup> set; NM\_013438 SacI-SpeI [pAG434]

gagctctgagccaattgtttctgaagtgttttggtagttctattaagaaatagttaaatattgtgcttttc  
agagcctcagagaaagggggacgggggtgggggggtggggcagcgggaatctgtcctggatggggccagctta  
aataatactggcaaccaagattctgttaggatttctgtgcatatagtgtagtaagaagatcattcaggg  
gtgaaaaacaaagagccgttttaatgatgttgagtacatttggctgttttatagcctttttctccctccc  
ccaaagaattctgtttgcctaactcccaaactgttgggggtggtacattcctttaggaccaattaaaacata  
attgagggtcagtgatacatttggctgactctggttcagtattctcttaggtgattatattctctcatgta  
cagttacaggaaattaaaatgttaaagtaacctaaaatgaattcagaccaataaaaatcaagggaaatacaa  
gttgattgcattacttctgtatgttgcttgctattaaaaagggttaagaggccagggttaccaccagtcctt  
gcactgttctgacactttccccaggaggaaaacaagtacaaagggttacgggtggaggcataagtaactagt

>pIS2 cloning site, pRL-SV40 sequence is in italics, restriction sites are underlined

*gaacaataattctaggagctctataaccggtctcgatatcactactagtgtctagagcggccgct*

**Table S5.** Sequences of UTR fragments assayed in Figure 6.

Reporter plasmids encoded Renilla luciferase and were constructed in pIS1. pIS1 was derived from pRL-TK (Promega) by insertion of a multiple cloning site (shown below) within the region corresponding to the 3' UTR of the luciferase mRNA. Listed are sequences of UTR fragments, annotating their name, the restriction sites used in cloning (5' site – 3' site), the reporter plasmid name (in brackets), and the miRNA target sites (underlined). To disrupt miR-25 sites, the seed match TGCAAT was changed to TcgtAT.

## &gt;Figure 6H; CDH10 SacI-SpeI [pAG651]

gagctctttcctgtaggatgtctcatggaatataatgatcattttatTTAATcacttccaagagccaaagc  
tatggaaatacagtggtgtccatcttagtaaaataaaagataatttcagaaacatgaacaggatagttctcc  
cttaagcaacctcacaacaagccgcttctgttaggtacatgtcctgcccttgcaaatgaagcttttaaaa  
aggtgaagaaaaatTTTACAGTATATCCTGTTCTGTACATTAATAAAAAACAAAAATGTACATGTGAT  
gttagtaggtgtgatatgcaacctgggtatacagacatttgtgcaatttcatttcatcaaattctatctgct  
aatgttttatattactagt

## &gt;Figure 6H; EVA1 SacI-SpeI [pAG652]

gagctctttcatgagcagtgacggatagtttagcttactatgTTTTCCCCCAATTCAATGATCTATAACA  
acagagcaaagtctatgctcatttgcagactggaatcattaagtaatttaataaaaagattgtgaaacagc  
atattacaagtttgaaaattcagggctggtagaaaatacaactctaaatgatgataattttgtacagttt  
tatataaaaactctgagaactagaagaaattataaactTTTTTCTTTTAAATTTCAATTCACTGTTTAT  
tttgggggaggaagactttggtagggagcaagaaataccaaaactactttaaaggaataaaaccaactt  
tattctTTTTTCCCCATACTGGTAGATAAAGCAAACTTTATAAGTGGGCTATTGAAAGAAAAGTTACAA  
gcttaagatacagaagcatttgttcaaaggatagaaagcatctaaaagtttaggctcaagatcaatcttta  
cagattgatattttcagtttttaactgactggactgcagatgtttttcttttaacaaaactggaattttca  
aacagattatctgtattttaaagttagacacttgatattttccaataactatttttaaaaaattgtatga  
tttacatatgaacctcagttctgaaattcattacatatctgtctcattctgccttttatactgtctaaaa  
agcaaagttttaagtgcaatttttaaactgtaaattacatctgaaggctatataatcctttaaactcacattt  
tatattttttcttcacaatttcaactttgaaaatattataactggatatttcttcaaacagatgtcctgg  
atgatgggtccataagaataatgaagaagtagttaaataatgtatggacagttttccggcaaaaattttagc  
ttatgtcttggctaaatagtcagggggtaatatgggctgttactagt

## &gt;Figure 6H; DYRK2 SacI-SpeI [pAG653]

gagctcgtggataaaatgggaatggaaacgtgtgtgttccctccaaatTTTCTAGTATGATCGGTGAGCTGTT  
ttgtaaagaagcctcatattacagagttgcttttgcacctaaatTTAGAAATTGATTCATGAACGTGTTCC  
tcccttttctctgcttttctcctctctgttccctcttttaataaccacacgtctgttgcatttagttg  
tcttcttccctcagctgtgtatcccagactgttaatacagaaaagagacatttcagctgtgattatgacca  
ttgtttcatattccaattaaaaaagaacagcagcctagctacttaaggtggggatttccatagttccaaa  
gaagatttagcagattagagtggtcacacttttcaggtgccactgtaaggttctctcagcctgggaaacta  
tcaactctttctttaaaaaagaaggggtgaaaactcctctggagcaacagaagtcactttggctgttcag  
taaggccaatgtaacaacacgttttagaggagaaaagttcaacctcaagttaaatggttgacttattct  
tcgtatcattagaagaaccccagagatagcattcctctattttattttactttcttttggattgcactgat  
tgTTTTTGTGGGAATGACACTTTATCTGGCAAAGTAACGTAGAGTTTGGTAAAAGAATATTTCTCTCTG  
aataataattattttcacagtgaaaatttcagatattttatcactaatgtatgagcaatgatctatatcaat  
ttcaaggcacgtgaaaaaaatttttttagtatgtgcaattttaatatagaaagatttctgcctgtttggacaa  
taggttttgggtagtagacagattaggataagtaagcttatatatgcacagagattattgtattacctgtaaa  
ttgatttacaagtaactttaaagcgtgggtcccagtgaggccaagaaagtttactagt

## &gt;Figure 6H; SLC37A3 SacI-NheI [pAG654]

gagctctgggaaagatcacactacatgcctgttgattggctcagtcactctgtgtctgatctaaacgtcat  
tcagccctagaagcatgaattgcttcaaatattgtcaactgttctcttccattttcattcaaatcaact  
ttgactcctggaagtattgagttctcctttcaaggaccataaggtacatcagttatcttgaacattctgac  
gtgtaaaggaccataaggtacatcatttatcttgaacattccgacgtgtaactcacagccgaagcactcca  
tcccagatttgttctggtggaacttaggatcctctaggaagctaatctgcttagtctatttttagaggatt  
gatctctggcacaagcagcttccctggagttacctcagcagaagactagaattagagaaaagggaaagacct  
ttcttcttagtaagtgtaagtagacagatgctctttgacttatgatgggggttatgtcccagtaaacctatg  
gaagtcaaatgcatTTAATACCCTGACTGGACACCACAGCTTAGCCTCGTCCACCCTAAATGTACTCAGA  
acacttagaattgcccacagttgggcagaatcatctaacacaaaactctattttataatcgagtggtgaata  
tatcatgtaatttattgaaatattgtacattatgttgaaattgcaaccatttcacaccattgtaaagttccaa



aaatcagaagctgaggactgtctgtacatgacattgaatcacatgaatggattactagggcctgaggggtg  
 tccggtctcttagaaaaatgtagagtatatatatcttcagggctgtgaattccatactagttatcaatattt  
 taagatcattctgtatatacatatTTTTAAATtATGCAAGCAAactaggaggagaatgtgcaattttgaggg  
 atacctaatttgcattcgggttaggggatatTTTTCAACCTcttgctttatactctgatatgggggtgtgtt  
 atgaacttgtaaatgttatttaaatcatgcagatttccaatcagtgatttgctcatttactgacaaaaagg  
 agctagt

>Figure 6H; NFIB SacI-SpeI [pAG656]

gagctcaacacaaaggcagaaaggaaagaaactgaagaaagaagataatagaccagcaattgcagcactta  
 caatcactaattcccttaagggtgaaactgtaatgacataaaaaagggtcgatgatatttctactgatggtag  
 atcgcagcccctgcaacgtagcctttgttacatgaagtccgctgggaaatagatgttctgtctctatgaca  
 atataTTTTAACTgactttctagatgccttaatatTTGcatgataagctagttttatttgggttagtattct  
 tgttgtttacgcattggaatcactattcctgggttatctcaccaacgaaggctaggaggcggcgtcagaggtg  
 ctgggtgacagagcctgagccagccatttataagcactctgatTTCTAAAAGTtaaaaaaaatataatga  
 aatctctgtagcctttagttatcagtacagatttattaaatttcggcccttaaccagcctttccagtggt  
 gtaaccagtttgaaatcttaaaaaagaaaaaatgaaaaaaaaggaaaaaaagaaaaaggaaaaaac  
 agtttgaacacaaaggctctatggaagaaatgcctctatgtaggtgaagtgttctctctgcatgcaacagt  
 aaaaatataataatTTTTCCCCACAAAAGAACTtaacagaggcaagtgcaatttataaaatttatat  
 ctaaaggggaatcatgattataagtcttccagcccttggactctaaattgaggggattaaaaagaatttaa  
 aataatttgaacgaatttattttccctcagtttttgagggcattaaaaaggcattaaatcaagacaaat  
 catgtgcttgagaaaaataaaattaatgaaaacacagcacttatgttgggttagctgcagcctccttggag  
 gtagaatttattttataaaatcttgggtgcatcaagaaccatagggtgtacaaaagggttctataaaat  
 ctgcattatagagacaaagaggcaggcaaatccatgtcacaagggtaaagcttacagtttacaactggga  
 acgccaggggtgtaggatataaaaaacgcactcttgagaaaaacaaatgtaatcaggggtgctgaaaacttgc  
 ggtgctttcagacattagccttgttcaacaaatttcttgtattgacagatccatagtggtgcatgggcagac  
 acatttgcctctatgactagt

>Figure 6H; PITPNC1 SacI-SpeI [pAG657]

gagctctctgatagagaaaaagactgctttgtcactcaaacatgttccctcgacctttcagtggtgcatgtg  
 actcagtaacttcacatagaatatgattccctaagtatgctacacagcatcatattagatgtaagatgtaa  
 gacttgcaaaaggcagagaaggaatcttctgtaaccacatagctgtatgccagagaggaagccttgttattgg  
 gcatttgatgaggtttggcatggacttcaaggataaatgaatgaaaactttgcaccacttttgttacaagg  
 tacggtgaaaaatagtgaaagttagtttccctctcaaatctaaaattctccaaaactctcaggcataa  
 catacttagctgttaaatTTTGAActgctaattactaataacttgaataccaatagttactgagattcctat  
 tttgtgggttagtctgactcaggatttggagcctaattaactctaaacttttgaaaattttaatcatcaagc  
 tatagaggctccaagtgcaattaataataaactagt

>Figure 6H; MGC23401 SacI-SpeI [pAG658]

gagctcccctggctaaggctctgtgtaaggcagacaagcgttatttgatcatatcaagttccctacaatatcc  
 tgtcctcaaaaccggaagcaatgaacatgatcctcttcgggtggataaatgaacttccctgtttggcctgct  
 tctaggccctgccagatttctataacatcatatacgtaatagttcctcaagtgactgacatttattt  
 taattttgctttgttttttttttattttctccccatccctttattttgtgttattcctgactcacttgaca  
 ctctctgatgcctgagagattcctgtttgggatttaatatccagggctgtgtttacagtaaaaaaagcagg  
 cagtccttttagtTTTTCTTTTTAAATTTTTTgagattcttcatttcaggatttaaaactatagcagt  
 ccatcttaaggaaagtgtaactgccatggccacaagtctgctagttgcacttgaatgctctatcaggggtg  
 ttattaccctttctacgttctggactccttggcagagactgtttaaacttgaagattaaagaaactattgca  
 aatgccagtgcatcagaacctaaagagtggtcaaatattatgtgcaatTTTTTgtaaagaaattttaaatt  
 ataataaagtTTAACAGTTTAAAGAacagtttaatatTTGAACactagt

>Figure 6H; TESK1 SacI-SpeI [pAG659]

gagctcggacaccctgtaagaacagagcacacttgctggacagtgccagttccagatgggctgaccggctc  
 tctccccgtgtaggggagcccagcatggactcaagggacagagcacttccagtcgacccccggctcgc  
 gttcccgtggggatcactgaaccagacacagcattgctgacacatgagactaacacgtgcaattattttaa  
 aagatttcaataaaaactgcctggcactagt

>Figure 6H; PHTF2 SacI-NheI [pAG660]

gagctcttctttgcttcaggagtctcagctagggagtgaagtgtttacatcagactgtcttgtgcaattc  
 ttatatttttttactgggttactTTTTTTTACatttatttttagtctttatattttttttaaagcattg  
 atgtacttagttgttgaagggtgatgaaactgatatccagatacttgagatcctggtaattgggtcataaa  
 taattggcaaaaataacaaattgtgaaaatagaagccattgctcagcaccgtttctccatcaatgccgtgaa  
 cttgccttacttgaggaaaaattctttaaactttggaatattgcattgaactcagctatacacataaaacat  
 tttctttggtaaatcaagatccagtcaggggttctcttgaattattttggaacaatgccaggatccaaact

gattaagttacagtttaagcacccttcagttattaatatatacgggtattatataacaggtcaacaagtgtct  
 tttgatgataaaacttgtaatagagcaataattgtaaattgggtaccatactgtaagatattttgataaaaa  
 ttaactagtaatacttgtatattttgaaacactgggctgtttgcacagctccaactgtgcatgctcaaaa  
 tgtgcacttttttaaaattgttacttttaaatgcgatatctttatatgggatctgttatagtatactagggcat  
 gatatgggtatccttttgagtgaggtatatactcatctcacaagtgaagtgcctactgatattactaaagta  
 cattatgtttactcaagtaataatcttccccatgggtacactctagtgtaggctattcataccacactg  
 aatgaacaactgaagaataaggctaagaaccaataaaaatattctctaattgctagtgtgtaaaactgtat  
 ccaaattttcagaaaagacagcttcagcttgcaattctatcctctaaacttatctgggtgattctcccca  
 cccacccccattatataagggctatttttagatgcttttaacctccccacaataaatttgccaagtgtcc  
 aatgagaacttatcatgttgggtgtgttaggtaaatcgggcaaatatgatagtgtcttacattgggcttga  
 tctagt

>Figure 6H; HBS1L SacI-SpeI [pAG661]

gagctccgtttctggatacagtgaaatagctaacctctgtttcaagaatgcagttattaagtcaaaggaac  
 aatgtgcaattgatatgttttttagatgagagagaaaaattaaagctaaaattagctgcaagaagatttaa  
 taatcacctctgcaaaaattctaagttgccaactggcaagaagaagctaatgttaaaaacaactttgcctt  
 tgaaacgttaataaatggatttactttgctaagatttatggcaagtgtcaaaaatagtatctgaagatact  
 gaatcatcatgaaatgaactctacttctggccaaagcacaatgtatgttcagttttctcttttgattcaat  
 tatactgcacatgttttaaggaaaagtaacttaattgggtttttcaggcagttgatatttgacctaaagctt  
 tttttttttttccagttaatgctaagaaaagatttggggaagggtataataaaagtttttgggtgac  
 cataagaatgtccctccccaaaacaagtaacttgtgaaagtttaatttgggaattagtggaagctgttctt  
 ttgaaagccaagatatttttaagttgtaagccagctaataaaaatgccttagtttgagcataatacaaac  
 tgtgttttgttcttttagacatttatgagattctctgccactaacagtaaatatgatattaggggttttggg  
 gatctttttcacctaagagtttcttagctctgtcacatgaattcttttttatcctaattggcagatccaatt  
 tcatctcattcatttttttaaccataaacttgcttttccattctcactttttagaattatacctatgatggc  
 cttttctttatcttgettaccttatagattataagttccctgtgagtaagtaagagtcagttttcttta  
 aagtttcaacaacaaccccccaaggtttatttttaacaacaggtattcgttgagggtgccttctgggtgca  
 aggagcttttagagtaactagt

>Figure 6H; ACOX1 SacI-SpeI [pAG662]

gagctctaactctgcttcagaaagcgcctgtgtgcaactcaaattttgtggaatctttttcgaattcaaata  
 gctatagagcaaatgataaattgacccctttttataaatggagggaaaaaatgaacagatttcagagatta  
 aatgaaaaaaagcagatgttttaagtgcaattaacactgaaagagacctgttaaccattcagaaaaagct  
 taagaaatgcatatgacttcttttgaattgctgctgatcccagtagactatgacttttgataattagca  
 gaatttaactactgagtagttgattttttcacatttttaattgctaactcactggctatataagttttta  
 agcaaaggatatttttgaagtgggtgtagaaccttccaagctttctgctcagtggttctaccagacttacc  
 tggggcctggcttaaaagcaggattgaagaaaagggactgggggaaggaaaacttatggaaaacttgatgc  
 gaatgagtttctgcttggcacagctctctgctgcttctctcttctgctgatggattgcatttatcaact  
 attcatgctagcatttttccaacgagggaaacttatctcgacgggctactgtaggaccattgtctcgtgt  
 aattaggaattttccatttgaaggattgctaatttgtcacagtagtaggaagtatagggaaacctctcagc  
 tgtggcactgtttagcttttggagtgactagt

>Figure 6H; SFRS3 SacI-SpeI [pAG663]

gagctcatgtttttgtgagaatccttgggattaaagttttgggtacaaaattgttcttttaacttgaaagcctg  
 tttttccttgcaaaactcaaactctgtgagcttgggtaccaagtcagggtataacattcctattggaagccata  
 ctatattttcttgtaaagtgttttgaattaataaaaatatttagcataaattgtgtatagttagttgaacc  
 actgttaccattgttcttattccatgggaagcagttgggttacacgattcttattttataagaaacagctga  
 gaggcactatggattagttcttctgaagtgaaggaatatagatgtcacctaagtgatagtttaaccatttt  
 ttttttttttaggcatagaagccagttcagggtccataaatatttagtgaccaacatttttaagtatagcag  
 caacctgggtcttaaacacaaaagtaagttgcccattaaacaaatggccttttatcttttagcatgaaaactttc  
 cacaggtctaaaaattgcttccattttataaattttaggtgttgcattgggaattctaaagctgatccatcatg  
 atgtaaaagttcacaatatgggttcaaatgtaacagtgagaattgaaatagggagcagcacaaccttctt  
 cttagaaaatggcaggtgttgaatttcaaatttttgtgcaatttagattaaatcataatgcaacagctcttg  
 tggcttagtttcttactagt

>Figure 6H; GAA SpeI-NotI [pAG664]

actagtcccaacgtgtctaggagagctttctccctagatcgcaactgtgggcccggggccctggagggctgt  
 ctgtgttaataagattgtaaggtttgcctcctcacctgttgcggcatgcccggtagtattagccaccccc  
 ctccatctgttcccagcaccggagaaggggtgctcaggtggaggtgtggggatgcacctgagctcctgc  
 ttccgcgctgctgctctgccccaacgcgaccgctgcccggctgccagagggctggatgctgcccgtccc

cgagcaagcctgggaactcaggaaaattcacaggacttgggagattctaaatcttaagtgcaattatTTTT  
aataaaaggggcatTTTggaatcagcttctgcggccgc

>Figure 6I; TBL1X SacI-SpeI [pAG636]

gagctcaagaagaacctcgcatctTTTTgggtgtgtatgcaccttggcagccagcaggaaagcagcgaagagc  
cgcgccctctggcctcaagggagcattggcagaaccataaggtactgcagaagccgtcgaaaccgactg  
ctcggctggatttaggcgtgttggctacatctTTTcccacaaccgtataacgaccgatggctcatttctccaag  
agcaggettggcgagtccttgcagagctgacatagaggcgcccgcagtgctcacttagtctaacgctgacaga  
aatgaatgcagaaggaagatTTTcagtcctgaacgtgaattatagaggtagaacgtcgctaataatTTTctg  
ccatctTTTataatTTTctTTTgtctcacagaagactaggagaaagatctTTTTTaaataatctTTTTgtctgt  
TTTaaaaaattaaacaaggctTTTgtgttccctagaagagcttcatTTTcagtgaatctgggtgacctccatctg  
cttggctgtcataaccgcagacggacttattTTTgtcatttagcaagggggaaaaggccaaaggacaagggcc  
tcttctcccattgggtTTTctgTgggcagaagggctgaggaagatggccagcccgctggggctgctgggt  
caccagcagcgggtagggtgcaatctgggtgtgttccagcagtgagacgggtgttatTgtgaaggtggcat  
tcatctgcggagcAAAaccagccatcgggggaagggctcagggcttctgtggaacttggaaactgccagga  
ccacctgAAAagccaggggtgcgttgatcattctcagatcattgattggcctccacttgggtatgtgaatt  
attcatgtcccagaagaccAAAagtgtctggttctgagatgagtatTTTattctgttctgttccgaa  
acacttagcaaaagaaggtcacagtgatgtggagtgcgcgacccatctTTTgaagatagccagtgctcctgg  
atgaggtgatgatttcccgtcccaggactctgtgaagtttagagtacagttTgttgggggtccaaaagaca  
ccatctctaccccacccAAAataaaaaatgcactcatctctgtagaacatctgctgtcaaaggccagcctgtc  
gttagggcatggcttatgcttgacaaaccagtaacaactgtgggaactagt

>Figure 6I; SH3BP2 SacI-SpeI [pAG637]

gagctccaatccatccccttactTTTctgccatggagttccagcaggtcactctccctggcacaccttccag  
gctggattTTTTaatgaaacagactcagggaggtaggggctggcagggaccctagaatccttgtgattTTTc  
ttagcaccttatgtcagggaaacctaaactgaggtcagcacttgggcccactgacagtgactgactggggg  
agaaggtcctgcagcccccttcccctgggtgtgttctggggacctgtggtttgctggcgaaacaagtgat  
gaggtgggttagcggatgtgggaggctgtgacccagggggccataggggtgcgggtggaactgcaggccctg  
cagatgacggcagccagctgcttccaggaaccaggtgtccaaggccacctctgcaggggttctctctcag  
cctgctgggggtgagaggtcagtgaccacagccagggctggagcacagggagcttctgtTgttctgatct  
atctctggaaaaccagccattctctctcctcagtcagaatTTTtggccctgtctgacactgaactTgctt  
agggagtcagccactcccactgtggccatagttctctctcctgtaaaaTTTTattTTTtagtTTTTg  
TTTTtgatgtagtctcaccctgtcgcaccaggtggagtgcaatgcccgtgatctccgctcactgccacct  
ccgctctctagtTcaagcgattTTTcctgcctcagcctcccagtagctgggattccaggcgcccgcacc  
acgctggctaattTTTTgtattTTTtagtagagacgggattTTTatcatgttggccaggtggtctcgaact  
cctgacctcaggtgatctgcccaccttggcctcccaaagtgtgggattacaggcatgagccactgtgct  
ggccccttctgtaaaaTTTTTaaatggagaattgggtgcgagatgtggttccagcctggtgctgggggt  
gctgagctagtgagtggtgcagtcaggacacctTTTgctTTatgtcacttacacgggtcacctggagccggc  
tcaagtggctaaagcatcctggggcccagagccaggtgatagtcctctggccaactggacagttgaggtct  
tgtggttaaccgaagcccagctggggccttgggtccagcttctgcttcccagattctgcacctgctagcaca  
gctgtccacgtctgtgtgagctgttctaggactagt

>Figure 6I; C9orf25 SacI-SpeI [pAG638]

gagctctacctctgtgtgttcatggagctggagaaacaaaactgggtctctctccaccgggagctgagg  
aggggtgggggcccgttTgttTcagttacctgggggaacctcaccagcaccctgcccgccttcccagggtctg  
gccaagagagaagactggacggcagggaggtcaacattaacgagtggggggatcacaagccaggggcttg  
gccccacccagcgaagccatgaaactccaaagccccggcctcagcctaaccaggaaaggggctcggagggga  
gaaagggcccagggcagtggggacgggtcccagcacctcggagcccccttccacgccccctaccggcccat  
gttTctattTgcatTTTccccctcctcagatgggaagcctggcaagctgcccaccgggtagtTcccctca  
cccatcggatcactgccttcttctcctccttggccccattcaccgcttctctgcaactctgggagtggggca  
gggtaaggtgggcttacagacaggtcaggtttgggtgggtgtgatctgtcctaattggccccctaccaat  
gcatctatctgtctgccaccagccacccacctgccccacctcaccacgcttctgctcattgggtct  
caatcccagcctggaagcagggagtaaggctggactccaatggccattcccctcaccacgcccagccaaagc  
tgggaggtgcttcccagtaagaatccaggagcaagcttTgggtgaatccagtgggctgagtggtctatgg  
atgtgggtTgtTggatgtggtagggagtgcttagcagaatgtgtgtgtatctctgaggctgtcagggggtg  
ggTgggtgtgtgtctctgttggacctgtctctcctcagctcattcctgtcatagatgtgggtgtcctgg  
agggaaagtgcctgtgtggctgtgtttacagtgcaagggcggctcagcagtgcaatgggctgacagcctTgg  
accgggagtcagaagcctgggttctgggtgtagctctggccccctcctgtgatcttcaacaagccactTgc  
tttctctcgtcttTcagtttctcaactagaaaatgaacagcagctgaaattatgttgaagatcctTTTata  
cctgaaagagtttcttcatagaaatTTTctgtgggtggggagggggcaatctctgtgtgtctcagtatacct

aagggtgggggtggggcgggagttgtgtgtctctgtgaaagggcgaaggggcagttcctatcaggactgtgta  
 tgtctgagcacatgtggctctgtttgggattacgtgtttgtctgtgaatgtgtgtgtgtgtggaggggtg  
 tctattgtgtgtggctgtataggggtgtctgtagatcaagatgtgtatacagctgcttctgctattgctggg  
 ttgggggaggggactggaaagctgagactgaaaatcaagaggggaagaggtgaggaaggcccaccctggg  
 ctgggcagtgtagacctgccaccgtgtgaagaaaaatgaaagcaactagt

>Figure 6I; SOCS4 SacI-SpeI [pAG639]

gagctctaggcattacctcagggaaaagccttgacagtgaaaagaaactacttaatcgctaatagctagtc  
 tggaccagacacttaactgcgctttgggaatcatcctgggctaatacaggaataaaacttgacttttctatt  
 tttctctgaagctttacaggacatactcccactcccatttttttctaagcctacagcatcttgattcatag  
 tataattcctgaagtatgctgaatggactttttaaggttcccttagcatttttgtatagagttatagtga  
 tctttctataacctgcccattcacttaaataattcatgaaggggaatgggttaatttaaaggaagacctaat  
 aggaagaagattaaaggaagcttttagtcagcctgtggctcaagaatggctttcagttaaagtttgactctta  
 ttttctgaatttcagctaattggccaactgtggtcaagaatggctttcagttaaagtttgactctta  
 ttataataatataaagaatgtctcagtaattagaaatcccttaataagtagaacaatgtggcaagtagg  
 actcctatcgggtatacaaatccattttctttttataagaaaaacacataaaccattatcattttatcatga  
 gccaaagccattaagaagataaatccagttatcagcttctctgctctgaagttggatcattttatagatc  
 cacgcaatagagagcttccctcctatgaaacaaaaaccttgagatctcttttttttgagacagagctctcg  
 ctggtgtcagcccaggctggagtgcaatggcgcaatctcgggtcactgcaacctctgcttccagggtcca  
 gcaattctcctacctcagctcccaagtagctgagatgacaggcgtgtgccaccacgcccagctaattttg  
 tatttttagtagcgatgggtgtttcactacattggccaggctggctcgaactcctgacctcaggtgaccac  
 ccgctcagcctcccaaagtgtgggattacaggcatgagccactgtgccccggccaagatctaactcacgc  
 ttacttttcatataaataatttctgtcgcttttagctattgtcagaatccaataaacagcttacgcattca  
 ttttggtaaagcaaatccacaggaaaatagacaaaattataagagattcctggagacaacacaaggaaaa  
 caatgtttaaaagcaaatagcctgtgtaatgtaggtaatgtaatgcccaagtgaataaaagattttctg  
 tcaagcaactactgtttctactttgggggaaaaactagt

>Figure 6I; LPL SacI-SpeI [pAG641]

gagctcgaattctggatctttcggactgaggccttctcaactttactctaagtctccaagaatacagaaa  
 atgcttttccgcccagcaatcagactcatctacacagcagatgaatgatgttttagaatgattccctct  
 tgcattttggaatgtggtccagacgtcaaccaggaacatgtaacttggagagggacgaagaaagggctctg  
 aaacacagaggttttaaacagctccctaccattggcctgcatcatgacaaaagtacaaaatcaaggagat  
 aaaatctagatcaatttaattcttaataggctttatcgtttattgcttaatccctctctccccctctttt  
 tgtctcaagattatattataataatgttctctgggtagggtgttgaatgagcctgtaatcctcagctgac  
 acataatttgaaatgggtgcagaaaaaaaaaagaaaccgtaattttattattagattctccaaatgattttc  
 atcaatttaaaatcattcaatatctgacagttactcttcagttttaggcttaccttggctcatgcttcagtt  
 gtacttccagtgcgctctctttgttccctggctttgacatgaaaagatagggtttgagttcaaattttgcatt  
 gtgtgagcttctacagattttagacaaggaccgttttactaagtaaaaggggtggagaggttccctgggggtg  
 gattcctaagcagtgcttgtaaacctcgcgtgcaatgagccagatggagtaccatgaggggttgcatttg  
 ttgttttaacaactaatcaagagtgagtgacaactatttataaaactagatctcctatttttcagaatgc  
 tcttctacgtataaataatgaaatgataaagatgtcaaatatctcagaggctatagctgggaaccgactgt  
 gaaagtatgtgatctgaacacatactagaaagctctgcatgtgtgttgccttcagcataatccggaag  
 ggaaaacagtcgatcaagggatgtattggaacatgtcggagtagaaattgttccctgatgtgccagaacttc  
 gaccctttctctgagagagatgatcgtgcctataaatagtaggaccaatggtgtgattaacatcatcaggc  
 ttggaatgaattctctctaaaaataaaatgatgtatgatttgttgttggcatccccctttatattcatta  
 aatttctggatttgggttgtgaccagggtgcattaacttaaaagattcactaaagcagcacaatagcactg  
 gactagt

>Figure 6I; FANCC SacI-SpeI [pAG642]

gagctcctcaagtgagccttcggactcctgggtgcccgccggccagaccgtcagcttgataattactaaa  
 gcaaaagcctgggtgggagaacagggtttctagtttttacccaagctcaagctgcacatctatttttaaaaa  
 ttcaaagcttagaaccaagaatttgggtcatgaaccattaaagaatttagagagaacttagctcttttttag  
 actctttttaggagtcagggatctgggataaagccacactgtcttgctgtatggagaaattcttcaagggg  
 agtcaggggtccctcaggettcccttgtgtctccctggacctgectgacagggccacaggagcagacagcaca  
 cccaagcccgggctccggcacactcttccactctgtattttgctaaatgatgctaactgctacccaaaagg  
 cccttgggacatcagaggagccggcaggcgaaggtagaggatgtgttccagaaacattagaaggcaggatt  
 aattcagttagttagttctcttgttaaatggaaatgggaattggaaattcctgataaagaattggcctggc  
 tgggtgacagtggtcacacctgtgatccagcactttgggaggccaaggcaggggggattacttcagcccag  
 gagttccagactgctggctaacatggcaataccctatctctactaaaaatacaaaaattatcgggggtgca  
 atggcatgcatctgtaatccagctattcaagaggctgaggcatgaggatctcttgaaccgggagggtggg

agttgtagtgagccgagatcatgacactgcactccagcctgggcaacagagcgagaccatctcttaaaaa  
 aggcattggttagtgtaatctcaaggtaaacatcttatttcatgtcagtacagggtgctttttctttcaggg  
 acattctggaattgtattgggtgtacattcttttgggtctattctggtttgtcaagtgagtcaagacttgct  
 tttgtccattttgattttgtgtgtattagtctgagctctggctccgttttgaggtatgagcaaaagttttgct  
 ggattagaagctaaccttttagggaaattccttattttgggtatgtggcaatgctaatagatccactgaagat  
 ctggaaaattccaggaacttttcacctgagcctttctctgagaaaactagt

>Figure 6I; OPR1 SacI-SpeI [pAG644]

gagctcatgggacaggtcaaagcattagggccacctccatggccccagacagactaaagctgcctcctgg  
 tgcagggccgaggggacacaaggacctacctggaagcagctgacatgctgggtggacggccgtgactggagc  
 ccgtgccccctccctccccgtgcttcatgtgactcttggcctctctgctgctgctgctggcagaacctgggt  
 gggcaggcaccggaggaggagcagcagctgtgtcatcctgtgcccccatgtgctgtgtgctgtttgcat  
 ggcagggctccagctgccttcagccctgtgacgtctcctcagggcagctggacaggcttggcactgcccgg  
 gaagtgcagcaggcagcttttctttgggggggacttggcctgagcttggagctggcacctggaggacttg  
 cctgttccgactccacctgtgacgccccggccaccaccaggagaaagtgtccaggtgggggctggcagctccc  
 tggctgcagaccccgagctggccctgggcccagccgcacctctgaaggttttctgtgtgctgcacgggtgcag  
 gectcatccctgactgcagcttgactctgggcccacccccatttcccttcaggagaccagcgagaggccc  
 tggccattccctccagcgggtgcaatgaactatcatgctgtggaccgtcaaccagccctgcttctcagtg  
 tggggcaggtgtctcaggacgaaggcgccgcgtgaccacatgggcagctctgttcacaaagtggaggccctc  
 gttttcctggctcttgactgctctggtttgggtgggagaagattctctgggggtccccacatcctccaaggc  
 tccccctcacagcctctcctttgcttgaagccagaggtcagtgcccgctgtgtgttgcgggggaagctgtgt  
 ggaaggagaagctgggtggccacagcagagctcctgctctggggacgcctgcttcatttacaagcctcaagat  
 ggctctgtgtaggccctgagcttgtgcccacgggaggatggcttcacagcagagccagcatgaggggtg  
 gggcctggcagggcttgccttgagccaaactgcaaaggctgtgggtggctgtgaggacactgccccgggttggg  
 gggggggcgtctgtacctcaggggatgccccgctgtgggtcaccagagaatcacccttccctggctacaga  
 tggaaagctgcaggttgggtgactttgcaaatgcacttccctacagatgaactatataaagacctgcaacattg  
 aaaaaactcattttttccacaaaacttggccaggtaacctaccttaggcacctgcaaaagaacaggaagt  
 gatgactagt

>Figure 6I; OSBPL2 SacI-SpeI [pAG645]

gagctccttttaactcgaaccagtgggggaaagatggatcttgaagctaactcctgcagagagttttatag  
 aggccagggattgccttctaattatgataaaaacagaagtgaagagtttcagagcatcagattgagtgaaa  
 agttgtcagattctgtattttttaacaatcttcaataatgtaaagattacttttaaatatttaagttaa  
 actacttgaatagtattttgctgaagagcaagatatgcattaatcaccggttttatactgtccaaaatgaa  
 gcatccccgtgacaaaaccagagtgggcagaagcatcgagagcgtgacaggaaatcccaagactgcttccgc  
 ctgagaggcgtcccggctgcgattcgtgcccgtgtgtcagtgaggcctggctgtcacccgcacaccgctc  
 cgtgtctccagggggttcccttctctcacacgtcgcgtgtacccatagcactcttgtgtttctgtttttc  
 ccagtatgcatgtttaaaatagaagtgacaagaatcacatccggttgtgtcctgtgggagggtcagaggca  
 gaatctacttacagtggtgtaattaaagtattttaacaaaaataggtatgtgtccatctcagcattcacc  
 tttatcaagtgactgatttttttttctttttctttttttttttttttttttttttttttttttttttttt  
 gttgcccaggctggagtgcattggcatgatctcggctcaccgcacacctccgctcccgggttcaagcgatt  
 ctccctgcctcagcctcccaagtagctgggattacaggcagcgcaccaccacgcctggctgatthttgtattht  
 tagtagacacgggtttttcccatggttgggtcaggctggctcaaaactcccacacctcaagtagtctgcctgcc  
 tcaacctcccaaagtgtcgggattacaggcgtgagccactgcgcctggccgtgactgatthttttttcatgt  
 agaattgtcaacacgagagatcacagtgagcacttggaaagaccgtcgggtgtgtgacgcacgcacaca  
 ctcatgcacacgctgacacgggttgcattggagtcagggttactcaggccggcacttctgagtgacaggtg  
 ccacctgcgtgtgtcttggcgtccacatcacacctgtgacggaagcacttctggaagtgaacactcgtttt  
 gactagt

>Figure 6I; SSB1 SacI-SpeI [pAG646]

gagctccaactctgctcgggggtgggacgggtgcttcccacacctctgggagaaggctgcagccacctggggg  
 tcccaggggtgggtgggggtggcaggtggtagccacagctctgagagcagataccaggggtactaagaggtgct  
 tagacaagggtcgggtcccggcccaggggtcccagcggggccatgccatggcagataaagctcaggacgctc  
 aaaaactcccatggacccaaggcagaaaccaagaactgtctgcaggcaaaataagcaccacagcaccatc  
 ctggctgcccgtgccccgtaccctgtatthtcttttaacaataacaaaagccattttatthtccatct  
 agaaaggaaacctgtttcagtcacctctctctggctgttctgttactttccttccacctgtgcctccct  
 gggatattgtatgctcgcgccctccctgggcacatgtgcacacgtgccaggcacaagtatgtctctgg  
 gtcccttgcctgcagtttccagggggctctgctccaagtccctagcggggccctcaggagaaaatagcc  
 tcacgtgcaatctgggtgtcttccggggcccgctctggaagggtgcagcaattccccctgtgtctccaggta  
 accagctaactcttgggctcaggcacccttgcacaggggtgcattttcttttagtcttctgtgggtcttttga

tgtggggttgattttgcttttgcctttctagctgagatcccccaagggcatcctcagaagctctgggtgtg  
ccagaggacccccagaactaagaagggagggcgagtggtctccattccccgagaagccaggggaggggtg  
ggatggggaagaccaggagcagagtcgagcctcacagaagccagcgcgggtctctgctcagcaccagcc  
ggggctctggaccagggtaacagccccagttcatccaaccctctcagagcctcaagaggggtagctcg  
gctgccggaagagaggggtgcctatccctggcaaccctccacgtagcgtacccagcacctgccaccgc  
ctttgccatttctttgagcttgaagtactagt

>Figure 6I; EREG SacI-SpeI [pAG647]

gagctcaatcacagcccaaaatgtatggactaattatttttaaaatatatgaagacaataattctaca  
tgttgtcttaagatggaaatacagttatctttatcttttattcaaggaagttttaactttaatacagctcag  
taaatggcttctcttagaatgtaaagttatgtatttaaagttgtatcttgacacaggaatgggaaaaaac  
ttaaaaatataatgggtgatttttccaaatgaaaaatctcaattgaaagcttttaaaatgtagaaactta  
aacacaccttctgtggaggctgagatgaaaaactagggctcattttctgacatttgtttatttttggaa  
gagacaaaagatttctctgcactctgagccataggtctcagagagttaataaggagtattttgggctatt  
gcataaggagccactgctgccaccacttttggattttatgggaggctccttcacgaatgctaacccttg  
agtagagtctccctggatcacataccagggtcagggaggatctgttcttctctacgtttatcctggcatgt  
gctagggtaaacgaaggcataataagccatggctgacctctggagcaccagggtgccaggacttgtctccat  
gtgtatccatgcattatataccctgggtgcaatcacacgactgtcatctaaagctctggccctggcccttac  
tattaggaaaataaacagacaaaaacaagtaaatatataatgggtctatacatattgtatataatcctat  
acaacatgtatgtatacatgaccttaatggatcatagaattgcagtcattttgggtgctctgctaaccattt  
atataaaacttaaaaacaagagaaaagaaaaatcaattagatctaaacagttattttctgtttcctatttaa  
tatagctgaagtcaaaatgtgaagaacacattttaaatactctacttacagttggccctctgtgggttagt  
tccacatctgtggattcaaccaaccaaggacggaaaatgcttaaaaaataatacaacaacaacaaaaata  
cattataacaactatttacttttttttttttttttttttttttttttttttttttttttttttttttttt  
tgcagtgccacgatctcggctcactgcaacctcacctcccgggttcaagagatcctcctgcctcagcctcc  
tgagcagctgggactacaggcgcagtcaccatgccagctaaatttttgtattttttagtagaggcggggtt  
tcaccatgttggccaggatgggtctcaatctcctaactagt

>Figure 6I; AKRID1 SacI-SpeI [pAG648]

gagctcctgaacagatttttctcctccatgagtgccaagacgggtgcaatgggtagctccctagatgtgaa  
aatgaagagagaggggtttaccatcctgagaagaaataatgatggaaacatgtttaatgtttgtgcagtg  
aaatgactttgactcagtcacattgaagtaaaaatataaaatctgttgaaataactcttaggaaatatac  
aactaattttttcagatcagtatcttctagattccagacagaaaaaaattacacttcagaaaagacatcaa  
aggcaacatatgacaacaagtaatttatgaatctgggtagtagcgttggtaactctgagttctttaagggtt  
aacaggacaacgaagtgcagtggtcagtgctggcagtggtccttgaggctttggaccattgggttaca  
cagacacagccaagataagatccacacacacattattaacaaggaagtgatttgctgcaccttgagttgag  
aggactacatgtagaaaagctttaaataagagctaaacaccacagtggtcaacaaagccatcataatgttg  
gtgtttgtttccctccaatgtatgtatgttttagttttatccaacctgaggaatgaaaacttaactggatc  
tctcttgcatccttaaagggtcctgagctcaacatggctgctgatccatacttacacatcttactgtcaat  
cttgctacattgattatagaaccactattacgtgaaaaggcttgaacaaccaacactagt

>Figure 6I; CNM1 SacI-SpeI [pAG649]

gagctcacacatttcatgcatagcttggctcagaaggtgccattggcagacaggccacatgggagggtggag  
taggaggtctgaagattagttcaggggatggaccaagaatccccccagagctttaaagaagtgaggactca  
gccatgttggcgcgtgattgacattacagcagacagaaaactgttagtgactgggttctctgttagataagggt  
tccagcagcctggggcagtatgtctcagctggaatggaaagaatgtgagatggaacctcaagtcactgttt  
ttaccagggacacatctgttttggctcccaatcagcagctctcaatcgatcaataattctgctctggaaga  
gaaggaacagggagcagagagacccaactgggagccagagatggaacttcaggcttcaagtgcaaatcaaa  
gcaaaaaacaacaaaacttacatggaaaaactgtaagtgtgaaagcaagtttagccatgacaaacaaa  
gagtgccagggtcagccaagaaagatacataatctcatgggacttcagtgagggttacacaggaatgttga  
agaatccttcttctttcatgcatttgtccttctcccaccccttactacacctagcagatcagctgag  
tgtactttattccaagaacttactggatctctgggtttttctcctgaagtggggcaggtgcaattccaagc  
ataaccaccagatggcagagtgaccgcgatacctgcttccaagaataaaaacagttctgaaaagcaaccgc  
aaagcggggcgggtggctcacacctgtaatcccaacagtttggaaagaccgaggcgggtggatcacttgaa  
gtcaggagtttgagaccagcctggccaacatgggtgaaacccccatctctcctgggcatgtagtccagcta  
ctcgggagggtgagccaggagaatcgcttgaacctgggagggcagaggttgcagtgagctgagatcacacca  
ctgcacttcatcctaggcaacagagcagactctgtctccccctcaaaaaaaaaaagaaagaaagaaag  
agaaaagaaaagaaaagcaaccacagccagccttagggaaaacttggaaagtaagtgaatttgtcttcaga  
ataactatctccctttctgatctgtctcctactctttagatgttctcagtcagtaactcactgaactcatt  
gatcgagtgctgtctgctaaatctccaaccattcccaactagt

>pIS1 cloning site, pRL-TK sequence is in italics, restriction sites are underlined

*gaacaataattctaggagctctataccgggtctcgatatcact*actagtgttctagagcggccgct

**Table S6.** Context score parameters for different miRNA target sites, with Pearson correlation coefficient (*r*) and corresponding *P* values indicating the confidence in a non-zero slope.

**8mer**, mean value -0.31

| Determinant | Slope    | y-intercept | r     | <i>P</i> value     |
|-------------|----------|-------------|-------|--------------------|
| 3' pairing  | -0.0041  | -0.299      | -0.01 | 0.80               |
| Local AU    | -0.64    | 0.055       | -0.23 | <10 <sup>-13</sup> |
| Position    | 0.000172 | -0.38       | 0.18  | <10 <sup>-8</sup>  |

**7mer-m8**, mean value -0.161

| Determinant | Slope    | y-intercept | r     | <i>P</i> value     |
|-------------|----------|-------------|-------|--------------------|
| 3' pairing  | -0.031   | -0.094      | -0.07 | <10 <sup>-3</sup>  |
| Local AU    | -0.50    | 0.108       | -0.21 | <10 <sup>-32</sup> |
| Position    | 0.000091 | -0.198      | 0.11  | <10 <sup>-8</sup>  |

**7mer-A1**, mean value -0.099

| Determinant | Slope    | y-intercept | r     | <i>P</i> value     |
|-------------|----------|-------------|-------|--------------------|
| 3' pairing  | -0.0211  | -0.0211     | -0.06 | <10 <sup>-2</sup>  |
| Local AU    | -0.42    | 0.137       | -0.20 | <10 <sup>-26</sup> |
| Position    | 0.000072 | -0.131      | 0.10  | <10 <sup>-7</sup>  |

**6mer**, mean value -0.015

| Determinant | Slope    | y-intercept | r     | <i>P</i> value     |
|-------------|----------|-------------|-------|--------------------|
| 3' pairing  | -0.00278 | -0.0091     | -0.01 | 0.52               |
| Local AU    | -0.241   | 0.115       | -0.14 | <10 <sup>-26</sup> |
| Position    | 0.000049 | -0.033      | 0.07  | <10 <sup>-7</sup>  |



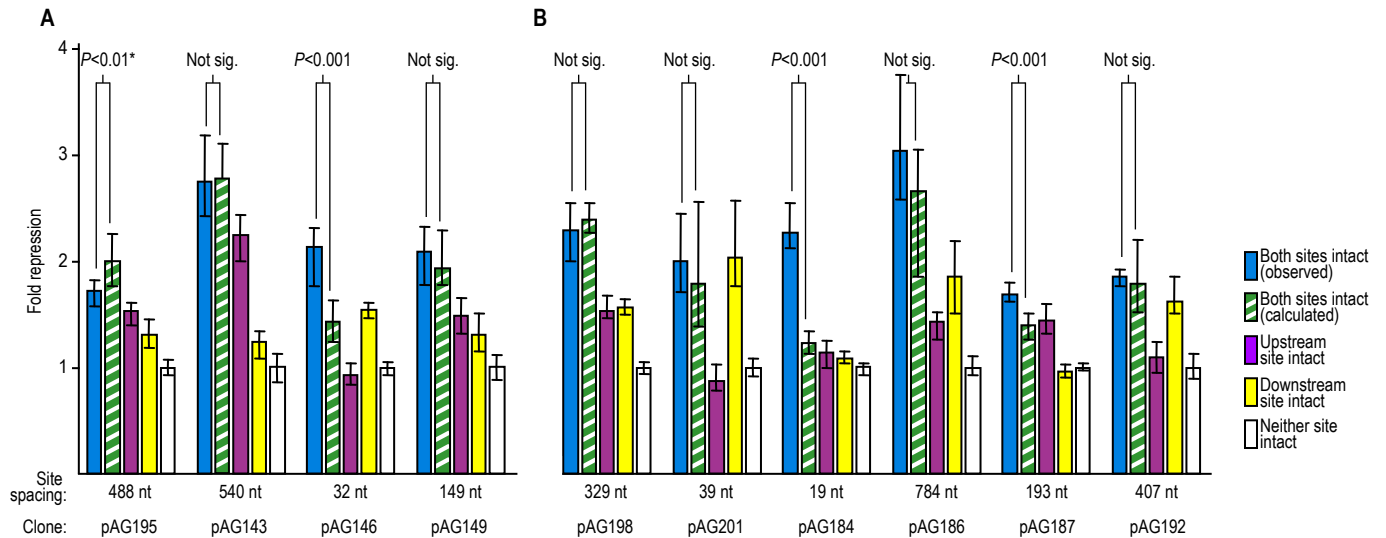

**Supplemental Figure 1.** MicroRNA-mediated repression of *Renilla* luciferase reporter genes fused to 3' UTR fragments containing two miR-1 (A) or miR-124 (B) sites, or mutant derivatives. After normalizing to the firefly transfection control, luciferase activity from HeLa cells cotransfected with each reporter construct and its cognate miRNA (A: miR-1; B: miR-124) was normalized to that from cotransfection of each reporter with a non-cognate miRNA (A: miR-124; B: miR-1). Plotted are the normalized values, with error bars representing the third largest and third smallest values among 12 replicates. *P* values (Wilcoxon rank-sum test) indicate whether repression from a reporter containing both sites (blue) was significantly greater than that expected from additive effects (green). For this additive model, repression expected from a reporter with two sites was the product of repression observed from otherwise identical reporters containing single intact sites (purple and yellow). The two UTR fragments containing the most closely spaced sites (pAG146 and pAG184) manifested significantly cooperative repression. pAG184 was selected for further study (Figure 1G). For six of the eight fragments containing less closely spaced sites, repression from constructs containing both sites (blue) did not statistically differ from that expected for additive repression (green). One exception was pAG187, which manifested significant cooperativity (pAG187), although the magnitude of the affect was relatively low. The other exception was pAG195, which manifested apparently negative cooperativity, although this result was of more borderline statistical significance. Parental clones are as described (Farh et al., 2005).

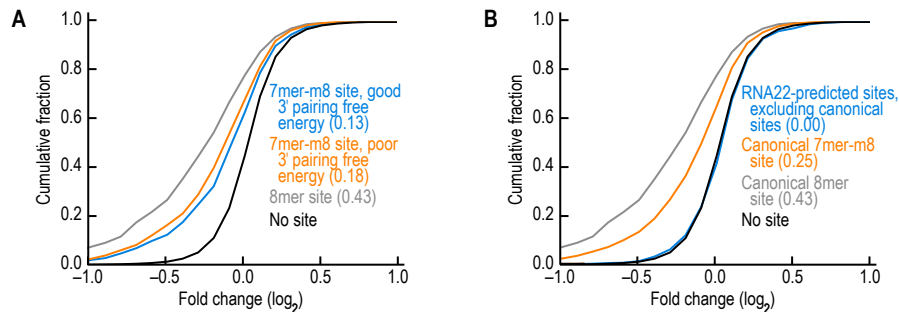

**Supplemental Figure 2.** Evaluation of previous algorithms designed to score productive pairing involving the 3' region of the miRNA.

(A) Performance of sites ranked using an energy-based rubric for predicting and scoring 3' supplementary pairing resembling those rubrics developed previously (Lewis et al., 2003; John et al., 2004; Krek et al., 2005). For each transfected miRNA, messages with single 7mer-m8 sites were identified together with the 20 UTR nucleotides upstream of each site, and folded with the miRNA using RNAhybrid (Rehmsmeier et al., 2004), without permitting the pairing of UTR nucleotides with each other or the pairing of miRNA nucleotides with each other. For each of the 11 miRNAs, messages were partitioned into four quartiles based on pairing free energy of their sites. Shown are the aggregate results for all 11 miRNAs for the quartile with the lowest deltaG values (most stable predicted pairing) and highest deltaG values. The quartile with the lowest deltaG values performed significantly worse than that with the highest deltaG values ( $P = 0.0056$ , two-sided K-S test). (Some previous methods that consider pairing to the 3' region of the miRNA normalize the predicted pairing free energy for each site to that of the fully paired miRNA. The results of this figure would have been the same if we had done similar normalization because for each of the 11 miRNAs considered, messages with sites were split evenly into the four equal quartiles before the sites for different miRNAs were combined.)

(B) Performance of sites with extensive Watson-Crick and G:U pairing along the length of the miRNA, but without canonical seed pairing, as proposed by Miranda et al. (2006). MicroRNA target predictions for the transfected miRNAs were obtained from the RNA22 web site. These predictions had been assigned to miRNAs using pairing parameters ( $G = 0$ ,  $M = 14$  and  $E = -25$  Kcal/mol), which were more stringent than those used in the published work (Miranda et al., 2006), but we used them because the larger set described in the published work was not disclosed in November 2006. Predictions for miR-124 were not considered because these were for a miR-124 variant that was offset by one nucleotide from the miR-124 that we transfected. The predictions for the remaining 10 transfected miRNAs were filtered to remove those with canonical seed sites (1161 of the 1720 predictions for these 10 miRNAs had at least a 6mer site in their 3' UTR). The remainder consisted of sites with imperfect seed pairing and extensive 3' pairing. When considering their downregulation on the microarray, such sites performed no better than all the other genes with no seed site ( $P = 0.096$ , one-sided K-S test). The performance of canonical 7mer-m8 and 8mer sites (Figure 1B) is shown for comparison. This result suggests that the many thousands of noncanonical predictions proposed by Miranda et al. (2006) did not include any more functional predictions than expected by chance.

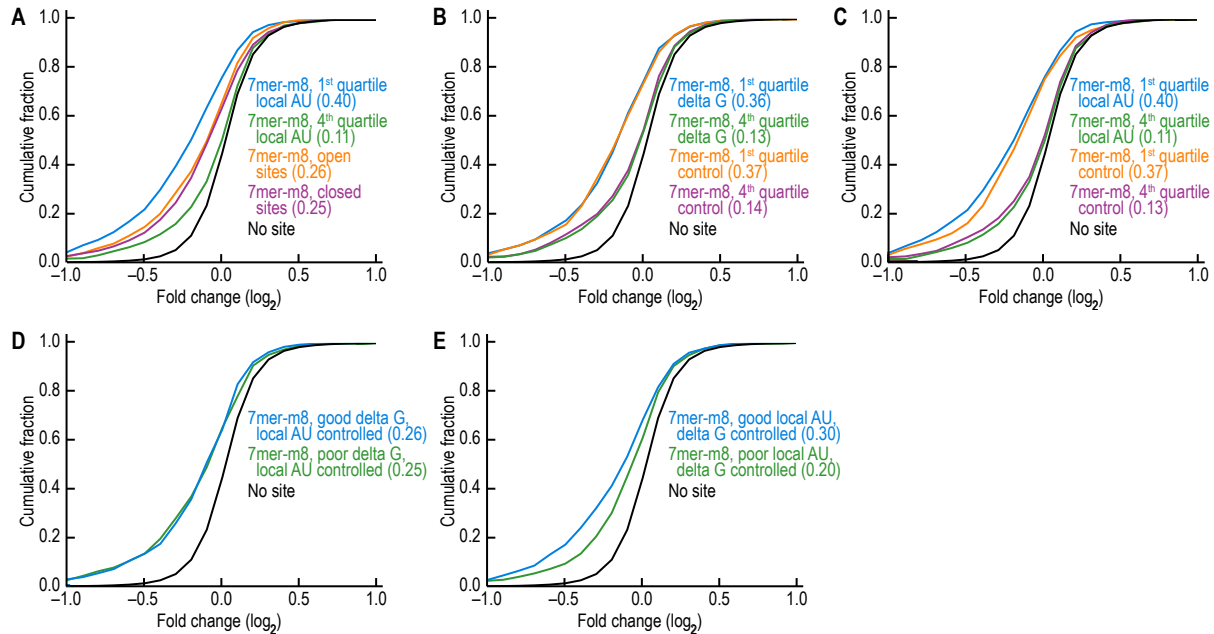

**Supplemental Figure 3.** Evaluation of existing algorithms designed to score site accessibility by predicting UTR secondary structure.

(A) Performance of sites with three or more nucleotides in open structure, as determined by the algorithm of Robins et al. (2005). Messages with a single 7mer-m8 site were split with respect to open structure (defined as at least 3 nt continuous unpaired within site). Shown are cumulative distributions of mRNA changes on the array for messages in the highest and lowest quartiles. A slight difference was observed between open and closed sites, but this difference was not significant ( $P = 0.066$ , 1-sided K-S test). Performance of sites in the highest and lowest quartiles with respect to local AU content (Figure 3) is shown for comparison.

(B) Performance of sites flanked by low or high predicted stability of UTR regions flanking the seed site, as determined by the algorithm of Zhao et al. (2005, 2007). Messages with a single 7mer-m8 site were split into quartiles with respect to average predicted stability of 70-nt segments immediately flanking both sides of the site. Shown are cumulative distributions of mRNA changes on the array for messages in the highest and lowest quartiles. To control for the effects of global nucleotide composition, 10 random 70-nt regions in the same UTR were folded and messages were again split into quartiles with respect to average predicted stability. Among sites that were significantly downregulated on the array ( $P < 0.01$ ), there was no significant difference in stability when comparing the 70-nt UTR regions flanking the site and randomly selected 70-nt regions from the same UTR ( $P = 0.120$ , Wilcoxon rank-sum test). Thus, the success of this algorithm in predicting down regulated messages could be attributed to a correlation between predicted stability near the site and more global properties of the UTR.

(C) Performance of sites in the highest and lowest quartiles with respect to local AU content, as scored in Figure 3B. To control for the effects of global nucleotide composition, 10 random positions in the same UTR were evaluated for local AU content. For sites that were significantly downregulated on the array ( $P < 0.01$ ), the difference in AU content was significant when comparing the region immediately adjacent to the authentic site and randomly selected regions from the same UTR ( $P = 0.0069$ , Wilcoxon rank-sum test.) Although local AU content correlated with AU content throughout the remainder of the UTR, not all of the success of the algorithm could be attributed to a correlation with the more global property.

(D) Performance of sites flanked by low or high predicted stability of UTR regions flanking the seed site, after controlling for local and global AU content. To measure the residual effect of predicted secondary structure after controlling for local and global AU content, 1000 pairs of matched sites were picked randomly such that 1) their local AU content was within 5 percentiles of each other; 2) their global AU content was within 5 percentiles of each other; and 3) their average predicted folding stability in the regions flanking the sites, as determined by the algorithm of Zhao et al. (2005), was at least 30 percentiles apart. Repression was not significantly greater among sites with weaker predicted folding energy when AU content was held constant ( $P = 0.088$ , 1-sided K-S test). Thus, the specific predicted secondary structures scored by the algorithm of Zhao et al. were not informative after controlling for local AU content.

(E) Performance of sites with different local AU contents, after controlling for global AU content and predicted folding stability in the regions flanking the sites. 1000 pairs of matched sites were picked randomly such that 1) their global AU content was within 5 percentiles of each other; 2) their average predicted folding stability in the regions flanking the sites, as determined by the algorithm of Zhao et al. (2005), was within 5 percentiles of each other, and 3) their local AU content was at least 30 percentile apart. Repression was significantly greater among sites with high local AU content ( $P < 10^{-7}$ , 1-sided K-S test.). The Spearman correlation between predicted stability and global AU content was 0.6665, while the Spearman correlation between local AU content and global AU content was 0.6253. Because of the high co-correlation of these variables with global nucleotide content, random sampling of sequences in the same UTR was necessary to control for global AU and reveal underlying context determinants in the local neighborhood of effective sites.

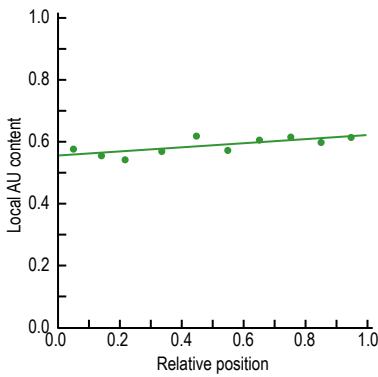

**Supplemental Figure 4.** Evaluation of correlations between determinants used to generate target site context scores. We observed a modest but significant ( $P = 0.0015$ ) Spearman correlation between local AU content and position within 3' UTR (evaluated as in Figure 3B and 5, respectively), indicating a slight increase in local AU content as the local window traversed from the 5' to the 3' termini of the 3' UTR. This correlation could not account for the contribution of position to final context score, because sites located close to either terminus of the 3' UTR were most effective, rather than sites near the 3' terminus of the 3' UTR.

We evaluated whether scores for the three determinants used to generate the final context score were significantly correlated by Spearman correlation, and found that they were not: position score and 3' pairing score,  $P = 0.092$ ; position score and local AU score,  $P = 0.51$ ; local AU score and 3' pairing score,  $P = 0.40$ .

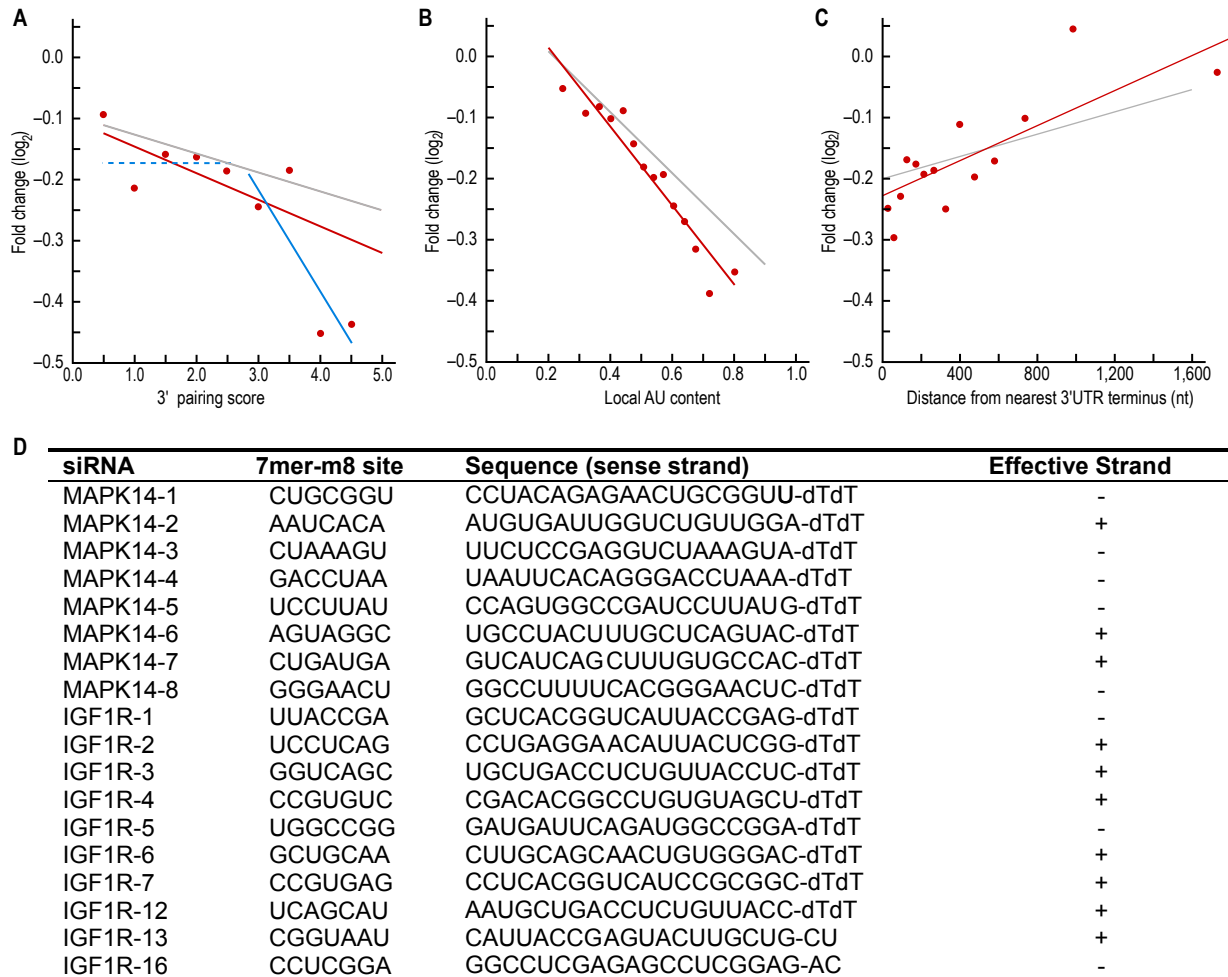

**Supplemental Figure 5.** Evaluation of scoring schemes in an independent dataset. We examined correlations between fold change in mRNA level and 3' pairing score (A), local AU content score (B) and position (C), observed in a dataset not used in development of scoring rubrics (Jackson et al., 2003). For each of the transfection experiments, motif analysis was performed (Farh et al., in preparation) to determine the motif most significantly associated with downregulation. Names and sequences of siRNA sense strands from Jackson et al. (2003) transfection experiments are shown (D); in general, the seed site for one of the strands (indicated as +/-) predominated in accordance with a strand preference for the 5' end with the weaker pairing energy (Schwartz et al., 2003). Results of 18 experiments, each transfecting a duplex for a different siRNA, were consolidated. Messages with a single 7mer-m8 site were scored for 3' pairing, local AU content and position using our previously developed rubrics (Figures 2F, 3B, and 5, respectively) and analyzed as in Figure 6A-C (shown in red;  $P < 10^{-4}$ ,  $r = -0.08$ ,  $P < 10^{-31}$ ,  $r = -0.24$ ,  $P < 10^{-6}$ ,  $r = 0.10$ , Pearson correlations). For comparison, the regression lines derived in Figure 6A-C are also shown (grey). The fold changes were larger in the set of siRNA transfections than in the miRNA transfections, and thus the slopes of the regression lines are correspondingly steeper.

For the 3' pairing feature (A), messages with sites scoring  $>3.5$  were markedly downregulated, a result consistent with the miR-155 knockout data (Figure 7E) but in contrast to the linear trend observed for the miRNA transfections (Figure 6A). Perhaps sites with low scores ( $<3.0$ ), which includes most of the sites (81%), are negligibly affected by 3' pairing, and those with higher scores are affected more than anticipated by fitting all the data to a linear model (red line). To better model this behavior, sites with low scores were excluded (average fold change indicated by dashed line), and the remaining data was modeled by linear regression (blue line). Although more complex, this approach also appears to better reflect the miR-155 in vivo results (Figure 7E). However, because of their rarity, more data will be required to accurately quantify the efficacy of sites with exceptional 3' pairing (scores  $>4.0$ ), which comprise only  $\sim 1\%$  of the population.

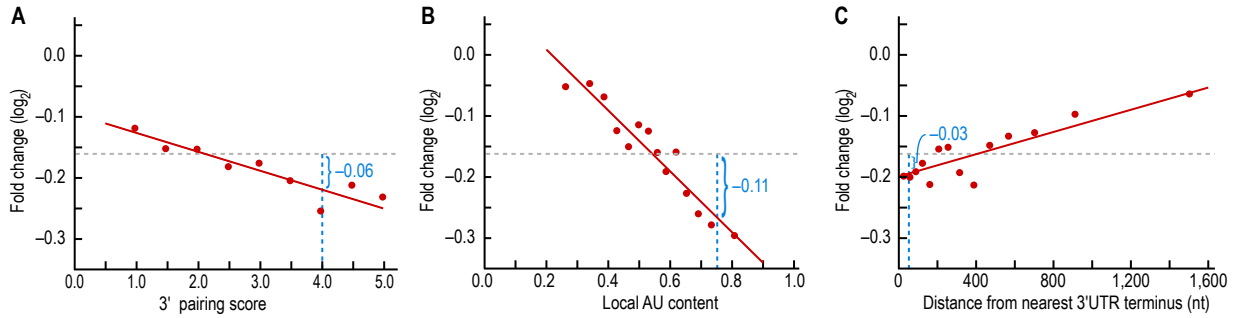

D

TargetScan predicted targets of Human SNX2 - Windows Internet Explorer

http://eors.wi.mit.edu/cgi-bin/targetscan/vert\_40/view\_gene.cgi?axid=9606&gs=SNX2&showcnc=0

TargetScan  
Prediction of microRNA targets  
Release 4.0: May 2007

Human SNX2 3' UTR

Gene: Human SNX2 NI\_063100 3' UTR length:457

Conserved sites for miRNA families conserved in Human, Mouse, Rat, Dog, and Chicken

miR-140 miR-139/301 miR-25/32/92/363/367 miR-499 miR-1206

Key:  
Sites conserved in Human, Mouse, Rat, Dog, Chicken  
8mer 7mer-m8 7mer-1A  
Less conserved sites  
8mer 7mer-m8 7mer-1A

[Show conserved sites for miRNA families conserved in Human, Mouse, Rat, Dog, Chicken]  
[Show poorly conserved sites and sites for poorly conserved miRNA families]  
[View SVG image of miRNA sites]  
[View table of miRNA sites]

```

.360.....370.....380.....390.....400.....410.....420.....430.....440.....
Hs AUGAAGUGAAUACCAAGCUCUUGAAUAUGUUCACUUAUACAUUCUGUACAGAAAUUACGA-UUUUGUGAUUACAGUUAUAAA-AUGAUAI
Ms AUGAAGCAAUUGCAAGCUCUUGAAUAUGUUCACUUAUACAUUCUGUACAGAAAUUACGA-UUUUGUGAUUAGUUAUAAA-AUGAUAI
Rn AUGAAGCAAUUGCAAGCUCUUGAAUAUGUUCACUUAUACAUUCUGUACAGAAAUUACGA-UUUUGUGAUUAGUUAUAAA-AUGAUAI
Cf AUGAAGCAAUUGCAAGCUCUUGAAUAUGAUCUUAUACAUUCUGUACAGAAAUUACGA-UUUUGUGAUUACAGUUAUAAA-AUGAUAI
Gg GUGAACCAUUUA-AUGUCUCGAGUAAGCUCUUAACAUUCUCGU-AAAAAUCAUG-UUUUGUGAUUACAGUUAUAAAAGGGGAUAI
miR-1206
Con aUGAA...AAUUA..cAAUGC..UoGA..UAAuG..UCACUUAAACAUCUUCUGUacAgAAAUAu..Ga..UUUUGUGAUu..AGUUAUAAA..auGAUAI
    
```

**Conserved**

|                                 | predicted consequential pairing of target region (top) and miRNA (bottom)   | seed match | site-type contribution | 3' pairing contribution | local AU contribution | position contribution | context score | context score percentile |
|---------------------------------|-----------------------------------------------------------------------------|------------|------------------------|-------------------------|-----------------------|-----------------------|---------------|--------------------------|
| Position 399-405 of SNX2 3' UTR | 5' ...AUAAGUUCACUUU--ACAUUCU...<br>             <br>3' GGUGUGAAGGAAUGUAAGGU | 7mer-m8    | -0.16                  | -0.07                   | -0.11                 | -0.03                 | -0.38         | 94                       |
| Position 399-405 of SNX2 3' UTR | 5' ...AUAAGUUCACUUU--ACAUUCU...<br>             <br>3' AUGUAUGAAGAAUGUAAGGU | 7mer-m8    | -0.16                  | -0.06                   | -0.11                 | -0.03                 | -0.36         | 93                       |
| Position 399-405 of SNX2 3' UTR | 5' ...AUAAGUUCACUUU--ACAUUCU...<br>          <br>3' CCGUUUCUUCUUGUAAGGA     | 7mer-m8    | -0.16                  | 0.05                    | -0.11                 | -0.03                 | -0.25         | 83                       |

Context score and features that make up the context score are evaluated as in Grimson et al. (submitted).

**Poorly conserved**

| predicted consequential pairing of target region (top) and miRNA (bottom) | seed match | site-type contribution | 3' pairing contribution | local AU contribution | position contribution | context score | context score percentile |
|---------------------------------------------------------------------------|------------|------------------------|-------------------------|-----------------------|-----------------------|---------------|--------------------------|
|---------------------------------------------------------------------------|------------|------------------------|-------------------------|-----------------------|-----------------------|---------------|--------------------------|

Context score and features that make up the context score are evaluated as in Grimson et al. (submitted).

Bioinformatics and Research Computing  
© 2006,2007 Whitehead Institute for Biomedical Research

TargetScan Release 4.0  
Questions: wibr-bioinformatics@wi.mit.edu

Whitehead Institute for Biomedical Research  
Compatibility

**Supplemental Figure 6.** Deriving and annotating the context score for a miR-1 target site within the *SNX2* 3'UTR, using the regression parameters of Supplemental Table 6.

(A) Regression relating repression on the array and 3' pairing score, identical to Figure 6A but illustrating how the 3' pairing contribution of the context score was determined for the miR-1 site of *SNX2*. The miR-1 site of *SNX2* had a 3' pairing score of 4 (scored as in Figure 2F). Using the slope of the regression line ( $-0.031$ , see Supplemental Table 6 for all parameters used to calculate context scores), y-intercept value ( $-0.094$ ), and mean fold change for a 7mer-m8 site ( $-0.161$ ), a score of 4 corresponded to an expected fold change of  $-0.06$  ( $\log_2$ ) over that of an average 7mer-m8 site, calculated as follows:  $4(-0.031) - 0.094 + 0.161 = -0.06$ .

(B) Regression relating expected repression on the array and local AU content score, identical to Figure 6B but illustrating how the local AU content contribution of the context score was determined for the miR-1 site. The miR-1 site of *SNX2* had a local AU content score of 0.76 (scored as in Figure 3B). Using the slope of the regression line ( $-0.50$ ), y-intercept value ( $0.108$ ), and mean fold change for a 7mer-m8 site ( $-0.161$ ), a score of 0.76 corresponded to an expected fold change of  $-0.11$  ( $\log_2$ ) over that of an average 7mer-m8 site, calculated as follows:  $0.76(-0.50) + 0.108 + 0.161 = -0.11$ .

(C) Regression relating expected repression on the array and position within 3'UTR, identical to Figure 6C but illustrating how the position contribution of the context score was determined for the miR-1 site. The miR-1 site of *SNX2* was located 52 nt from the closest UTR terminus. Using the slope of the regression line ( $0.000091$ ), y-intercept value ( $-0.198$ ), and mean fold change for a 7mer-m8 site ( $-0.161$ ), a distance of 52 nt corresponded to an expected fold change of  $-0.03$  ( $\log_2$ ) over that of an average 7mer-m8 site, calculated as follows:  $0.000091(52) - 0.198 + 0.161 = -0.03$ .

(D) TargetScan 4.0 web page illustrating how context scores derived from the newly identified specificity determinants have been annotated for predicted sites in mammals (Targetscan.org). Shown is the context score of the miR-1 target site in *SNX2*, with the contributions from the site type and three context determinants. The combined context score for the miR-1 target site in *SNX2* was equal to the mean repression for the 7mer-m8 site plus the three contributing scores ( $-0.161 + -0.06 + -0.11 + -0.03 = -0.36$ ). This context score corresponded to a predicted repression in the top 7th percentile of miR-1 sites. To account for the other two context determinants, sites falling within 15 nt of a stop codon are flagged, and sites within optimal distance for cooperative action are displayed.
